# Supplementary material for: Impact of Procalcitonin-Guided Antibiotic Management on Antibiotic Exposure and Outcomes: Real-world Evidence
Source: PubMed Central journal article supplement (PMC5695623; doi:10.1093/ofid/ofx213), 2017-10-03
Supplement: ofx213_supplement-data.pdf [file ofx213_supplement-data.pdf]

Supplemental Data

- i. Diagnostic Related Group (DRG) considered for study inclusion and analysis
  - 1. Pneumonia (177-179, 193-195)
  - 2. COPD (190-192)
  - 3. Kidney and Genitourinary Infection (688-690)
  - 4. Sepsis (871-872)
  - 5. Biliary Tract Infection (444-446)
  - 6. Skin and Skin Structure Infection (572, 575, 602, 603, 622)

ii. Distribution of Infection-Related Deaths

| DRG                            | DRG Description          | Pre-PCT<br>N=985 | Post-PCT<br>N=1167 |
|--------------------------------|--------------------------|------------------|--------------------|
| 871, 872                       | Sepsis                   | 8 (0.8%)         | 8 (0.7%)           |
| 190, 191, 192                  | COPD                     | 7 (0.7%)         | 9 (0.8%)           |
| 177, 178, 179<br>193, 194, 195 | Pneumonias / Respiratory | 53 (5.3%)        | 16 (1.4%)          |
|                                | Total                    | 68 (6.9%)        | 33 (2.9%)          |

**Supplement Table 1.** Infection-related deaths by DRG (Broad Category)

iii. Length of Stay (LOS) Distribution by Cohort

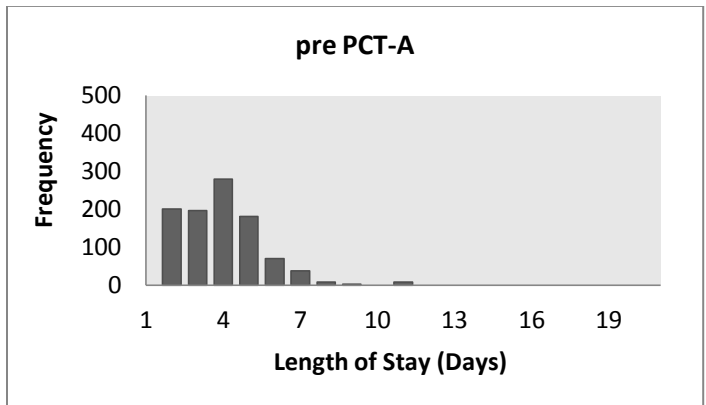

**Supplement Figure 1a:** Distribution of Length of Stay (LOS) pre PCT-A implementation

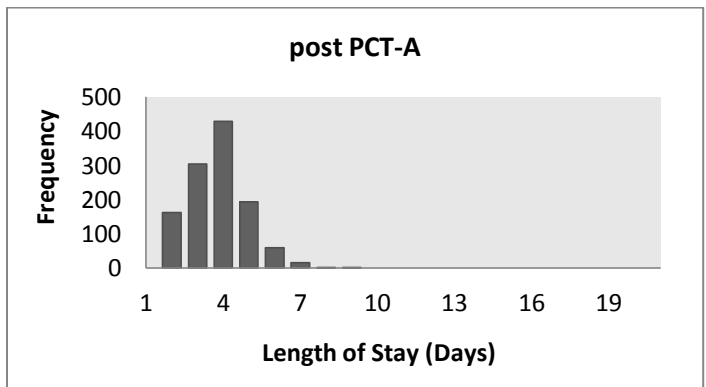

**Supplement Figure 1b:** Distribution of Length of Stay (LOS) post PCT-A implementation
